# Supplementary material for: Trial of labor after cesarean in preterm is preferable decision for reducing neonatal breathing disorders – Propensity score matching in observational single center study
Source: Research Square preprint supplement (doi:10.21203/rs.3.rs-8338349/v1), 2026-02-03
Supplement: Supplementary file 1 [file 586c00edecd3ff129e816c1b.docx]

**Supplementary material**

Supplementary Table S1. Criteria for TOLAC in this study

|  |
| --- |
| 1) One previous cesarean delivery |
| 2) former cesarean performed low transverse incision |
| 3) singleton and vertex presentation |
| 4) no history of myomectomy |
| 5) no contradiction of vaginal delivery |
| 6) well informed on the risk of TOLAC |
| 7) consent of emergency cesarean |

Supplementary Table S2. Neonatal outcomes regarding different weeks of gestation

| **26–32 weeks of gestation** | **TOLAC (n = 14)** | | **CS (n = 11)** | | p-value |
| --- | --- | --- | --- | --- | --- |
| median | Min–Max | median | Min–Max |
| **Respiratory disorder** | 9/14 | 64.2% | 10/11 | 90.1% | 0.180 |
| **5 min Apgar score** | 8.5 | 6–9 | 8 | 3–10 | 0.609 |
| **pH of umbilical artery** | 7.3 | 6.97–7.45 | 7.32 | 7.10–7.40 | 0.585 |
| **BE of umbilical artery** | -6.3 | -14.5–1.1 | -0.7 | -9.8–4.1 | 0.007 |
| **Blood loss at delivery** | 286 | 65–1,925 | 846 | 229–1,400 | 0.015 |
| **NICU admission** | 14/14 | 100% | 11/11 | 100% | - |
| **Incubation rate** | 3/14 | 21.4% | 7/11 | 63.6% | 0.049 |
|  |  |  |  |  |  |

| **33–34 weeks of gestation** | **TOLAC (n = 15)** | | **CS (n = 10)** | | p-value |
| --- | --- | --- | --- | --- | --- |
| median | Min–Max | median | Min–Max |
| **Respiratory disorder** | 5/15 | 33.3% | 8/10 | 80.0% | 0.041 |
| **5 min Apgar score** | 8 | 6–10 | 9 | 7–10 | 0.397 |
| **pH of umbilical artery** | 7.33 | 7.12–7.39 | 7.27 | 7.15–7.40 | 0.048 |
| **BE of umbilical artery** | -2 | -8.1–3.1 | -3.7 | -7.5–0.2 | 0.347 |
| **Blood loss at delivery** | 539 | 252–1,221 | 813 | 250–1,054 | 0.144 |
| **NICU admission** | 15/15 | 100% | 10/10 | 100% | - |
| **Incubation rate** | 1/15 | 6.7% | 2/10 | 20.0% | 0.543 |
|  |  |  |  |  |  |

| **35–36 weeks of gestation** | **TOLAC (n = 31)** | | **CS (n = 41)** | | p-value |
| --- | --- | --- | --- | --- | --- |
| median | Min–Max | median | Min–Max |
| **Respiratory disorder** | 2/31 | 6.5% | 17/41 | 41.4% | <0.001 |
| **5 min Apgar score** | 9 | 8–10 | 9 | 6–10 | 0.428 |
| **pH of umbilical artery** | 7.3 | 7.19-7.52 | 7.32 | 7.10–7.49 | 0.164 |
| **BE of umbilical artery** | -3.8 | -8.4–1.5 | -1.4 | -11.5–2.9 | <0.001 |
| **Blood loss at delivery** | 461 | 109-2,674 | 892 | 300-3,460 | <0.001 |
| **NICU admission** | 17/31 | 54.8% | 23/41 | 56.1% | 1.000 |
| **Incubation rate** | 0/31 | 0% | 0/41 | 0% | - |
|  |  |  |  |  |  |
